# Supplementary material for: Coordination driven self-assembly of four new molecular boats using a flexible imidazole-containing donor linker
Source: Royal Society of Chemistry journal article supplement (doi:10.1039/b713783d), 2008-01-01
Supplement: b713783d.pdf [file b713783d.pdf]

## Supplementary Materials

### Coordination driven self-assembly of four new molecular boats using a flexible imidazole containing donor linker

Sushobhan Ghosh, Rajesh Chakrabarty, and Partha Sarathi Mukherjee\*

*Department of Inorganic & Physical Chemistry, Indian Institute of Science, Bangalore-560012, India. Tel.: +91 80 22932827; FAX: +91 80 23601552.*

*E-mail: [psm@ipc.iisc.ernet.in](mailto:psm@ipc.iisc.ernet.in)*

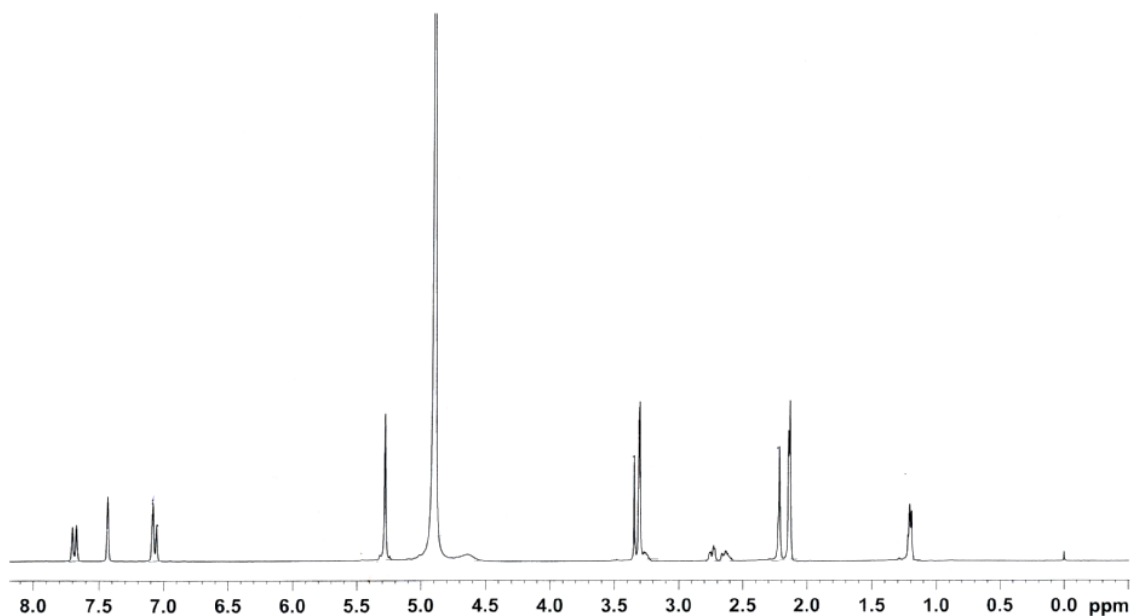

Fig-S1: <sup>1</sup>H NMR of **2b**. Peaks at  $\delta$  4.88 ppm is corresponding to solvent water in MeOH-d<sub>4</sub>

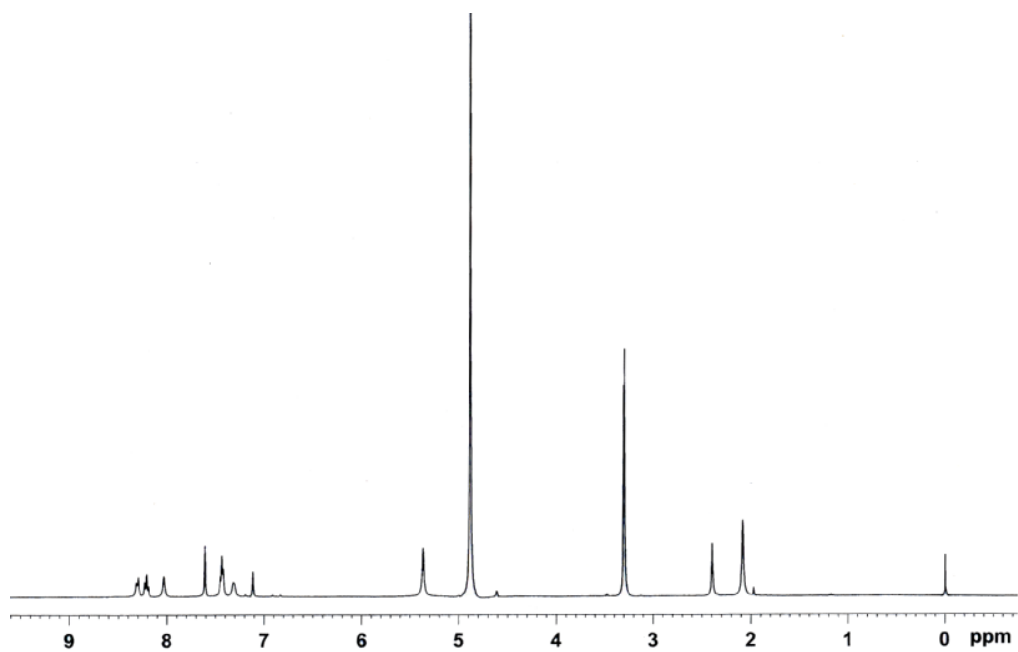

Fig-S2:  $^1\text{H}$  NMR of **2c**. Peak at  $\delta$  4.88 ppm is corresponding to water in  $\text{MeOH-d}_4$ .

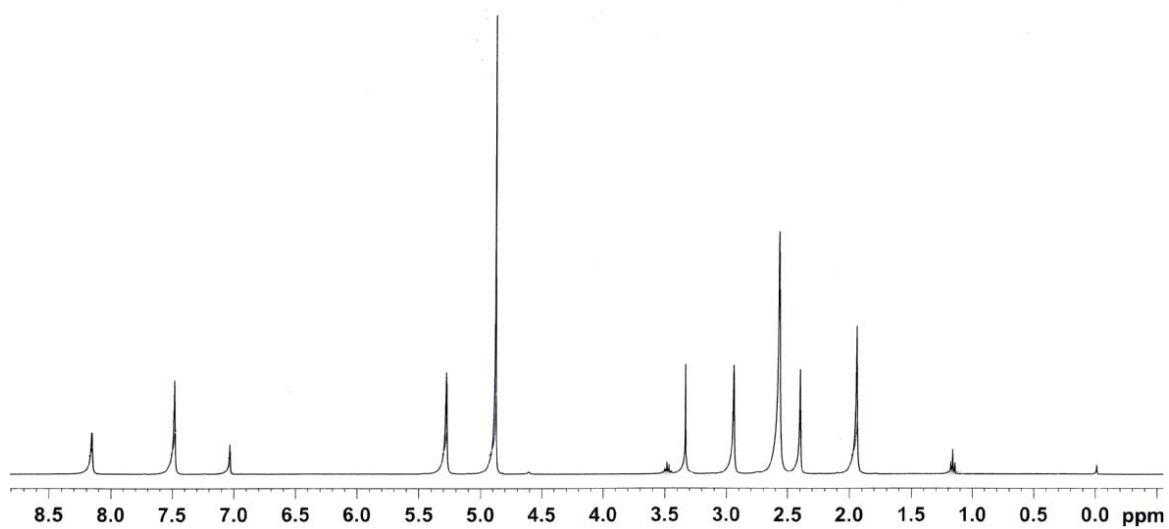

Fig-S3:  $^1\text{H}$  NMR of **2d**. Peaks at  $\delta$  4.88 and at 3.5 and 1.2 ppm are corresponding to solvent water and ether.
